# Phylogenetic relationships and genome size evolution within the genus *Amaranthus* indicate the ancestors of an ancient crop

Markus G. Stetter and Karl J. Schmid

Institute of Plant Breeding, Seed Science and Population Genetics, University of Hohenheim,  
Fruwirthstr. 21, 70599 Stuttgart / Germany

## Keywords

Amaranth, flow cytometry, orphan crop, SNAPP

## Corresponding Author

Name: Markus Stetter

Address: Institute of Plant Breeding, Seed Science and Population Genetics (350)

University of Hohenheim

Fruwirthstraße 21

D-70599 Stuttgart / Germany

Tel: +49 711 459 24435

Fax: +49 711 459 24458

E-Mail address: mgstetter@gmail.com

Running title: Amaranthus phylogeny

## Abstract

The genus *Amaranthus* consists of about 70 species and harbors several cultivated and weedy species of great economic importance. A lack of suitable traits, phenotypic plasticity, gene flow and hybridization made it difficult to establish the taxonomy and phylogeny of the whole genus despite various studies using molecular markers. We inferred the phylogeny of the *Amaranthus* genus using genotyping by sequencing (GBS) of 94 individuals from 35 *Amaranthus* and compared single nucleotide polymorphism (SNP) calling rates with reference-based and *de novo* methods. For reference-based SNP calling we used the distant sugarbeet *Beta vulgaris* and the closely related *Amaranthus hypochondriacus* as references, and in addition two different parameter sets for the *de novo* SNP calling. We obtained different numbers of SNPs and proportions of missing data, but the phylogenetic trees calculated from these data were very similar. We estimated a species tree for the genus using the multispecies coalescent. Both phylogenetic methods supported the taxonomic grouping into three subgenera although the subgenus *A. Acnida* consists of two highly differentiated clades. In contrast, the Hybridus complex within the *A. Amaranthus* subgenus that includes grain amaranths and their wild relatives was well separated from the other species. However, it was not differentiated into species but into geographic origin from South and Central America. Different geographically separated populations of *Amaranthus hybridus* appear to be the common ancestors of the three cultivated grain species and *A. quitensis* might be further involved in the evolution of South American grain amaranth (*A. caudatus*). We also measured genome sizes of the species and observed little variation with the exception of two lineages that showed evidence for a recent polyploidization.

# 1 Introduction

The *Amaranthus* genus has a world-wide distribution and harbors 70 species. The taxonomic differentiation of these species has proven difficult because only few traits are suitable for this purpose despite a high phenotypic diversity. In addition, there is a high level of phenotypic plasticity and a propensity to form interspecific hybrids and hybrid swarms (Greizerstein and Poggio, 1994; Wassom and Tranel, 2005; Brenner et al., 2013). Fertile hybrids can be obtained in crosses of distant species from different subgenera (Trucco et al., 2005). The disposition for natural hybridization further complicates the taxonomic differentiation of species.

Several species in the genus are of high economic importance and they include grain and vegetable crops as well as invasive weeds (Sauer, 1967; Costea and DeMason, 2001). The three species *A. cruentus*, *A. hypochondriacus* and *A. caudatus* are cultivated in South and Central America for grain production. Together with their wild relatives *A. hybridus* and *A. quitensis* they form the Hybridus species complex and the latter two species have been suggested as ancestors of the three grain amaranth species, but the domestication history of amaranth is still under debate (Sauer, 1967; Kietlinski et al., 2014). *A. tricolor* is cultivated as leaf vegetable in Africa and Asia, in addition to *A. cruentus*, *A. dubius* and *A. hybridus*, which are also used as vegetable crops. Both seeds and leaves are high in micro nutrients and have a favorable amino acid composition (Rastogi and Shukla, 2013) and are promoted as valuable crops for cultivation outside their native ranges. Weedy amaranths are the other group of economically and agronomically important species in the genus. The best known is Palmer amaranth (*A. palmeri*) because of its tolerance of the herbicide glyphosate. For example, yield losses in soybean fields due to Palmer amaranth infestation can range from 30 to 70 % (Bensch et al., 2003; Davis et al., 2015). Other weedy species of the genus include *A. tuberculatus*, *A. rudis* and *A. retroflexus*, which also lead to substantial yield losses in a diversity of crops (Bensch et al., 2003; Steckel and Sprague, 2004).

The taxonomy and phylogeny of the genus was investigated using phenotypic traits and genetic variation. The most recent taxonomic revision defined three subgenera that include *Amaranthus Albersia*, *Amaranthus Acnida* and *Amaranthus Amaranthus* (Mosyakin and Robertson, 1996; Costea and DeMason, 2001). Previous studies with different genetic marker systems could not identify a consistent phylogeny of the genus that corresponds with the taxonomic classification

## Amaranthus phylogeny

---

(Lanoue et al., 1996; Chan and Sun, 1997; Wassom and Tranel, 2005; Das, 2014). Due to the difficulty of differentiating *Amaranthus* species by phenotypic traits, a total number 70 named species may an overestimate if different populations of the same or closely related subspecies as well as hybrids are classified as different species. Almost 40 species are currently stored in the US American (USDA/ARS) and the German (IPK Gatersleben) *ex situ* genebanks and are readily available for taxonomic and phylogenetic analyses. In particular an analysis based on genome-wide genetic markers has the potential to improve the taxonomic classification and evolution of the whole genus beyond the grain amaranths and their close relatives, which are the best studied species (Xu and Sun, 2001; Jimenez et al., 2013).

The rapid development of sequencing technology allows to utilize genome-wide polymorphisms from different species for phylogenetic analysis. Reduced representation sequencing methods, such as genotyping by sequencing (GBS) can provide thousands of single nucleotide polymorphisms (SNPs) for genetic analysis (Elshire et al., 2011; Poland et al., 2012) although for non-model species SNP detection can be challenging without a reference genome. In such species SNPs are identified by using the reference sequence of a different, but closely related species, or the *de novo* assembly of sequencing reads (Catchen et al., 2011, 2013). Despite these limitations, GBS and related RADseq approaches have been used for phylogenetic analyses of both closely and distantly related taxa (Ariani et al., 2016; Eaton and Ree, 2013; Harvey et al., 2016; Nicotra et al., 2016)

Several software tools were developed for phylogenetic analyses based on biallelic markers. For example, SNAPP (SNP and AFLP Package for Phylogenetic analysis) infers species trees directly from biallelic markers by implementing a full coalescent model (Bryant et al., 2012). It integrates over all possible trees instead of sampling them explicitly, which results in a high statistical power, but is computationally expensive because it scales with the number of samples and markers (Paul et al., 2013), and requires high performance computers to analyse a species-rich genus like *Amaranthus* with thousands of markers.

The availability of a phylogenetic tree for a taxon allows to test hypotheses regarding phenotypic traits or other characters of interest. Species in the genus *Amaranthus* show variation in several traits such as C<sub>4</sub> vs. C<sub>3</sub> carbon fixation, reproductive system (monoecious vs. dioecious) and genome duplication. The latter process is commonly observed in plants and the

## Amaranthus phylogeny

---

genus *Amaranthus* is no exception because it is considered to be a paleoallotetraploid with a genome duplication between 36.7 and 67.9 Ma ago (Clouse et al., 2016). Haploid chromosome numbers reported for *Amaranthus* species are 16 and 17 (Greizerstein and Poggio, 1994, <http://data.kew.org/cvalues>), which indicates a cytological stability within the genus although there are several tetraploid species like *A. dubius* and *A. australis*, which likely have a different genome size or structure. Therefore, the variation of genome size within a genus is an interesting trait for analysis in the context of species formation and other phenotypic or ecological traits.

In this study we inferred the phylogeny of the genus *Amaranthus* using molecular markers and analyzed genome size variation to identify putative polyploidization events that may have played a role in speciation or influenced ecological traits. Of particular interest was the relationship of cultivated amaranths with their ancestors because the domestication history is not well understood. A genus-wide phylogeny may identify the ancestors of this ancient crop and allow to consider the evidence in the light of previous domestication models. Furthermore, the relationship of herbicide resistant weed species with their relatives will identify species that allow to conduct comparative analyses to identify the evolutionary basis of herbicide resistance. Previously a diversity of molecular methods were used to infer a phylogeny of the *Amaranthus* genus that include seed proteins, RAPDs, AFLPs and SSRs (Khaing et al., 2013; Chan and Sun, 1997; Kietlinski et al., 2014). Most of these studies were applied to a subset of the species of the genus and gave inconclusive results (reviewed by Trucco and Tranel, 2011). In this study, we inferred a molecular phylogeny using a significantly larger number of species than previous studies using thousands of genome-wide markers identified with GBS. To evaluate the robustness of the phylogenetic analysis we compared different SNP calling methods that rely on reference sequences of distant relatives or on a *de novo* assembly of sequenced regions.

## 2 Material and Methods

### 2.1 Plant material

We obtained a total of 94 accessions representing 35 *Amaranthus* species from the USDA/ARS genebank and the German genebank at IPK Gatersleben (Table 1). Plants were grown under controlled conditions in standard gardening soil before leaves of young plantlets were collected for DNA and cell extraction. For genome size measurements all accessions were grown in two independent replicates.

### 2.2 DNA extraction and sequencing

Genomic DNA was extracted with the Genomic Micro AX Blood Gravity kit (A&A Biotechnology, Poland) using CTAB extraction buffer for cell lysis (Saghai-Marooft et al., 1984). Double-digest genotyping by sequencing libraries (GBS) were constructed as described previously (Stetter et al., 2015). For each accession two samples with different barcodes were prepared to assure sufficient sequencing output per accession. Fragment sizes between 250 and 350 bp were selected with BluePippin (Sage Science, USA) and the resulting libraries were single-end sequenced to 100 bp on one lane of a Illumina HiSeq 2500 (Eurofins Genomics GmbH, Germany).

### 2.3 Data preparation and filtering

Raw sequence data were processed with a custom GBS analysis pipeline. First, reads were sorted into separate files according to their barcodes using Python scripts. Subsequently, read quality was assessed with fastQC (<http://www.bioinformatics.babraham.ac.uk/projects/fastqc/>). Due to lower read quality towards the end of the reads, they were trimmed to 90 bp. Low quality reads were excluded if they contained at least one N (undefined base) or if the quality score after trimming was below 20 in more than 10% of the bases. Replicated data per accession were combined and subsequently analyzed as one sample.

## 2.4 SNP discovery

### 2.4.1 De novo SNP discovery

We used two different methods to call SNPs from the sequencing data, a *de novo* approach using Stacks 1.35 and an alignment to a reference genome. For the *de novo* approach we used the `denovo_map.pl` pipeline provided by Stacks to call SNPs directly from the processed data (Catchen et al., 2011, 2013). Highly repetitive GBS reads were removed in the `ustacks` program with option `-t`. Additionally, we analyzed data with two different minimum number of identical raw reads ( $m = 3$  and  $m = 7$ ) required to create a stack. These two settings resulted in different results in the SNP calling (Mastretta-Yanes et al., 2015) and we therefore used both settings for comparison. Two mismatches were allowed between loci when processing a single individual, and four mismatches between loci when building the catalog, which is the set of non redundant loci based on all accessions and is used as reference for SNP calling. SNPs were called with the Stacks tool `populations 1.35` with filtering for different levels of missing values.

### 2.4.2 SNP discovery with reference genome

In addition to the *de novo* approach we used the sugar beet (*Beta vulgaris*) RefBeet-1.2 (Dohm et al., 2014) and the *Amaranthus hypochondriacus* draft genome (Clouse et al., 2016) as reference genomes to align sequence reads. The processed sequencing reads were aligned using `bwa mem` (Li and Durbin, 2009) and SNPs were called with `samtools 1.2` (Li et al., 2009). The resulting SNPs were filtered for different levels of missing values at a locus with `vcftools` (Danecek et al., 2011).

The four SNP datasets had different numbers of missing values per locus, which reflect different availabilities of SNPs. The proportion of missing values ranged from 2% (Stacks data sets) to 50% (SNPs based on sugar beet reference; Table 2).

## 2.5 Phylogenetic analysis

### 2.5.1 Neighbor joining phylogeny

We constructed a neighbor joining tree with 1000 bootstraps from the pairwise Euclidean distance between all 94 individuals based the four datasets using the R package **ape** (Paradis et al., 2004) and calculated an uncorrected neighbor joining network using the **NeighborNet** algorithm (Bryant and Moulton, 2004) with **SplitsTree4** (Huson and Bryant, 2006).

### 2.5.2 Multi-species coalescent

We also used the multi-species coalescent implemented in **SNAPP**, which is part of the **BEAST** package, to infer species trees directly from unlinked biallelic markers (Bryant et al., 2012; Bouckaert et al., 2014). We reduced the number of individuals to a maximum of four per species because the **SNAPP** algorithm is computationally expensive. Additionally, we imputed the refmap datasets with **beagle** (Browning and Browning, 2016) before thinning all four datasets with **vcftools** (Danecek et al., 2011) to a distance of 100 bp which excludes multiple SNPs per GBS read. Since GBS loci are essentially randomly distributed throughout genome, we assume that the assumption of unlinked biallelic markers was fulfilled after this filtering step. VCF files were converted to nexus format using a Python script and **BEAST** input files were created from these using **BEAUti** (Bouckaert et al., 2014). Mutation rates were calculated with **BEAUti** and default parameters were used for **SNAPP**. We conducted ten runs per dataset. Log files were analyzed with **tracer** 1.6 to examine convergence and converging log and tree files were combined using **LogCombiner** with 15% burn-in. The effective sample size (ESS) was adequate ( $> 200$ ) for the important parameters but was lower for some  $\theta$  values. We proceeded with the analysis as the low  $\theta$  values should not influence the tree topology (Nicolson et al., 2016). **TreeAnnotator** was used to construct the 'Maximum clade credibility' tree and annotate it with posterior probabilities.



## 2.6 Genome size measurements

The genome sizes of 84 accessions representing 34 species were measured with flow cytometry and two independent replicates for each accession (Table 1). The tomato cultivar *Solanum lycopersicum* cv Stupicke was used as internal standard, due to its comparable genome size (DNA content = 1.96 pg; Dolezel et al., 1992). For the measurement, fresh leaves were cut up with a razor blade and cells were extracted with CyStain PI Absolute P (Partec, Muenster/Germany). Approximately 0.5 cm<sup>2</sup> of the sampled leaf was extracted together with a similar area of the tomato leaf in 0.5 ml of extraction buffer. The DNA content was determined with CyFlow Space (Partec, Muenster/Germany) flow cytometer and analyzed with FlowMax software (Partec, Muenster/Germany). For each sample, 10,000 particles were measured. The DNA content was calculated as:

$$\text{DNA content } 2C [\text{pg}] = \text{genome size tomato} \times \frac{\text{fluorescence amaranth}}{\text{fluorescence tomato}} \quad (1)$$

and the genome size (in Mbp) was calculated as:

$$\text{genome size } 1C [\text{Mbp}] = (0.978 \times 10^3) \times \frac{\text{DNA content } 2C [\text{pg}]}{2} \quad (2)$$

The conversion from pg to bp was calculated with 1 pg DNA = 0.978 × 10<sup>9</sup> bp (Dolezel et al., 2003). Means were calculated using R software (R Core Team, 2014) and an ANOVA was performed to infer differences in genome size for the species.

### 2.6.1 Genome size evolution

We combined the genomic data with the genome size measurements to study the genome size evolution. The 1 C genome sizes (Mbp) were mapped on the phylogeny using parsimony reconstruction in Mesquite 3.04 (<http://mesquiteproject.org>). In addition we used the **fastAnc** function from the **phytools** R package to conduct a Maximum Likelihood reconstruction of ancestral states (genome sizes) with default parameters (Revell, 2012). For this analysis we inferred the genome size of *A. acanthochiton* as the mean between its two closest related species (*A. blitum* and *A. lividus*) because **fastAnc** does not allow missing values. A Brownian motion

## Amaranthus phylogeny

---

197 model implemented in the **fastBM** function in phytools (Revell, 2012) was used to simulate the  
 198 evolution of genome size over the tree. 1000 simulations were run and branches where the true  
 199 value was outside a 95% interval were considered as significantly different.

## 200 **2.7 Data availability**

201 Sequence reads were submitted to the European Nucleic Archive (ENA) under accession number.  
 202 Analysis scripts, aggregated sequencing data and genome size raw data are available under Dryad  
 203 (<http://datadryad.org/>)

## 3 Results

### 3.1 SNP discovery

Until reference genomes for any species can be created on a routine basis, methods like genotyping by sequencing are an efficient method to survey genome-wide diversity in non-model species. To compare the use of GBS with and without a reference sequence for phylogenetic reconstruction of the *Amaranthus* genus, we used different methods and reference sequences for SNP calling. The number of aligned reads differed strongly between the *Beta vulgaris* and *Amaranthus hypochondriacus* references. Only 25.9% of the reads aligned to sugar beet and 74.8% to *A. hypochondriacus* (Table 2), which resulted in different SNP numbers. We identified 23,128 SNPs with the sugar beet and 264,176 SNPs with the *A. hypochondriacus* reference genomes. GBS data have a high proportion of missing values and the number of SNPs retained depends on the allowed proportion of missing values per SNP (Figure 1). For example, if no missing values are allowed only one SNP remained with the sugar beet and 247 SNPs with the *A. hypochondriacus* reference.

The *de novo* assembly with **Stacks** allowed us to use all reads for SNP detection at the cost that resulting contigs are unsorted and without position information on a reference genome. The minimum number of identical raw reads required to create a stack influences the SNP detection (Mastretta-Yanes et al., 2015). With a minimum number of three reads ( $m = 3$ ) we obtained 505,981, and with seven reads ( $m = 7$ ) 371,690 SNPs. After filtering out loci with missing values,  $m = 3$  retained 949 and  $m = 7$  retained 1,605 SNPs. The total number of SNPs recovered was higher for  $m = 3$ , but the number of SNPs without missing values was higher for  $m = 7$ . The two parameter values ( $m = 3$  and  $m = 7$ ) resulted in the same number of SNPs if a proportion of 20 to 30 % missing values per site were allowed. With both parameter values the *de novo* approach resulted in more SNPs than the reference-based SNP. We were able to retain a large number of SNPs if missing data in one individual per GBS locus were allowed, which corresponds to a cutoff of 2% missing values (Figure 1). For the phylogenetic analysis of the reference-based datasets we allowed 10% (sugar beet reference) and 50% missing values (*A. hypochondriacus* reference). The resulting total number of missing values ranged from 0.6% for the *de novo* to 31.7% for the dataset based on the sugarbeet reference (Table 2). For the

consecutive analyses we used all four datasets but in the following we present only the results obtained with the SNP data from the mapping against the *A. hypochondriacus* reference and include the other results as supplementary information because the results from all four data sets are very similar.

## 3.2 Phylogenetic inference

### 3.2.1 Neighbor joining phylogeny

The neighbor joining phylogeny based on Euclidean distances of allelic states shows that most accessions cluster with other accessions from the same species (Figure 2). Within the Hybridus complex, however, there is no strong separation of the species into different clusters. Based on the species names, four clades are expected, but only three are observed. The first consists of *A. caudatus*, *A. quitensis* and *A. hybridus* that all originated from South America. The second clade consists of *A. cruentus*, *A. hypochondriacus*, *A. hybridus*, which originated from Mexico, one *A. quitensis* accessions from Brazil and two hybrid accessions likely formed from species of the Hybridus complex. The third clade consists of *A. cruentus*, *A. hypochondriacus* and *A. hybridus*, as well as two hybrids, and one *A. dubius* individual (242\_dub; Figure 3). The accessions in this clade originate from Mexico, with the exception of two accessions of *A. cruentus* from Guatemala and one from Peru, and one *A. hypochondriacus* accession from Brasil. The NeighborNet network confirms this pattern and in addition outlines the extent of conflicting phylogenetic signals among accessions that may reflect gene flow or hybridization (Figure 3).

The three *A. tricolor* individuals cluster closely and form a clade with other *Amaranthus* species. Although the ability to resolve species level relationships seems to be limited with our data, the neighbor joining tree reconstructs the taxonomical structure of the subgenera that was previously defined using morphological traits (Figure 2 and S1). The phylogenies resulting from the four different SNP calling methods are highly similar and show that the tree topology of the genus is highly robust with respect to the SNP calling method (Figure S2).

### 3.2.2 Phylogeny based on the multispecies coalescent

For inferring the phylogeny with the multispecies coalescent implemented in the SNAPP program we used a subset of individuals for two reasons. First, there were more individuals of the species from the Hybridus complex than of the other species which may bias the analysis, and second because the computation time scales exponentially with the number of individuals. Therefore we randomly sampled four individuals in those species with more than four genotyped accessions. The combined chain length without burn-in was 3,980,000 for the SNP data based on the *A. hypochondriacus* reference. The cloudogram derived from the SNAPP analysis allows to identify the degree of uncertainty for several clades in the tree (Figure 4). For the group of species that include *A. tricolor* and *A. crispus* there was a high uncertainty between the species. Within the Hybridus complex the uncertainty was high among the cultivated *A. caudatus* and its putative wild ancestors *A. quitensis* and *A. hybridus*. In contrast, the split between these three South American species and the Central American species *A. cruentus* and *A. hypochondriacus* was strongly supported. Overall, the Hybridus complex is well separated from the other species (Figure 4 and 5).

### 3.3 Genome size evolution

The genome size measurements differed among the *Amaranthus* species although the range of variation was quite narrow (Table 3). Palmer amaranth has the smallest genome with a size of 421 Mbp, and *A. australis* the largest genome of 824 Mbp, which about twice the size of Palmer amaranth. Most species including the Hybridus complex had a genome size close to 500 Mbp (Table 3).

To test whether changes in genome sizes in the phylogeny reflect random evolution or non-neutral processes, we mapped the genome sizes to the phylogenetic tree obtained with SNAPP (Figures 5 and S3). There was a tendency for decreasing genome sizes within the *Amaranthus* subgenus, and a high variation of genome sizes within the *Acnida* subgenus because it included both the individuals with the smallest and largest genome sizes. Figure 5 further shows that *A. dubius* has a larger genome than the other species of the *Amaranthus* subgenus. Even though there were significant differences in genome size between species, the ancestral

## Amaranthus phylogeny

---

286 branches have wide confidence intervals and significantly differ in recent splits but not in early  
 287 ones (Figure S4 and S5). The ancestral genome size was inferred by **fastAnc** as 569 Mbp,  
 288 but with a large confidence interval of 416 Mbp to 722 Mbp that includes almost all empirical  
 289 genome size measurements of the extant species. The Bownian motion modeling along the tree  
 290 shows that several branches deviate from a neutral process. Both, the clade with the smallest  
 291 and the group with the largest genome sizes deviate from the model of neutral evolution, but  
 292 also some of the terminal branches (Figure 5).

## 4 Discussion

The *Amaranthus* genus has been considered to be a difficult taxon because of a high level of hybridization and gene flow between species that complicates the phenotypic separation of species. However, the genus harbors several economically important weed and crop species, and for this reason a good phylogeny and taxonomy of this genus is of great interest. We inferred a phylogeny using GBS-derived molecular markers and evaluated the robustness of the inference by using different methods of phylogenetic reconstruction using data sets derived from *de novo* and reference-based SNP calling methods.

### 4.1 Reference-based versus reference-free SNP calling

Genotyping by Sequencing (GBS) identifies thousands of markers but usually requires a reference sequence for mapping sequence reads. *De novo* methods allow to call SNPs without a reference genome. We compared both approaches to determine their efficiency in SNP identification. With the distant sugar beet genome as a reference only 26% of the sequencing reads could be used for SNP calling because the sequence divergence between sugar beet and *Amaranthus* species is too high for an efficient mapping despite the high synteny between *Amaranthus* and sugar beet (Clouse et al., 2016). This resulted in a small number of SNPs available for phylogenetic analysis. In contrast, the *de novo* assembly used all data and the number of SNPs obtained was even larger than from the mapping against the *A. hypochondriacus* genome. The proportion of missing data was also highest with the evolutionary distant sugar beet reference genome. Comparisons of different values for the number of identical reads (`-m` parameter) in Stacks showed that a smaller number of identical reads produced more SNPs, but we obtained more SNPs without missing values when requiring a larger number of identical reads, in accordance to earlier studies (Mastretta-Yanes et al., 2015). A reference genome from the same or a closely related species combines the advantage of a larger SNP number with linkage information (Andrews et al., 2016). Since the level of evolutionary divergence within the genus is unknown and only one reference sequence from an amaranth species was available, we compared the different approaches. Taken together, a comparison of the four SNP calling approaches with different numbers of SNPs and different levels of missing data showed that the resulting neighbor joining tree of the genus was

quite robust with respect to SNP calling parameters, because it did not differ strongly between datasets (Figure S1). A major disadvantage of the *de novo* approach is that information about physical map positions of SNPs is missing and it can not be tested whether SNPs are unlinked. To increase the chance that SNPs are unlinked, which is a requirement of the SNAPP algorithm, we used a double-digest protocol for GBS and filtered for one SNP per GBS locus, which should allow the reconstruction of the phylogeny using the multispecies coalescent method (Andrews et al., 2016; Bryant et al., 2012; DaCosta and Sorenson, 2016). This strategy has proven to be suitable in a recent study using GBS data for the reconstruction of the phylogeny of Australian *Pelargonium* (Nicotra et al., 2016).

## 4.2 Phylogeny of the *Amaranthus* genus

The species-rich genus *Amaranthus* has been divided into the three subgenera, *Amaranthus*, *Acnida* and *Albersia*. Several studies investigated species relationships in the genus using molecular markers, but most included only few species and did not allow conclusions for the whole genus (Chan and Sun, 1997; Kietlinski et al., 2014; Xu and Sun, 2001; Lanoue et al., 1996). We included all species that are currently available as *ex situ* conserved germplasm and genotyped several accessions per species to evaluate their evolutionary relationship (Figure 2). As expected, most accessions from the same species clustered together, and the subdivision of the genus into three subgenera based on phenotypic traits is largely consistent with our molecular data, although we observed some notable exceptions which we discuss below.

The species tree obtained with SNAPP largely reflects the neighbor joining tree which is based on individual accessions, although the cloudogram of all sampled species trees indicates uncertainties in the positioning of species like *A. deflexus*, *A. tricolor* and *A. crispus* in the tree topology (Figure 4). In contrast, a clustering of the genus into four basal clades is strongly supported (Figures 4 and 5). We compared our phylogeny with the published taxonomy of the *Amaranthus* genus (Mosyakin and Robertson, 1996). The subgenera *Amaranthus*, *Amaranthus* and *A. Albersia* show a clear split at the root of the tree, but *A. Acnida* is split into two separate clades (Figure 5). The species of *A. Acnida* were categorized as dioecious and grouped based on this trait (Mosyakin and Robertson, 1996) although *A. palmeri* and *A. tuberculatus* were later described to be phylogenetically divergent (Wassom and Tranel, 2005). Another explanation for



the observed split of *A. Acnida* species into two major groups may reflect the polyploid genomes of *A. tuberculatus*, *A. floridanus* and *A. australis* (see below). In our analysis, we treated all species as diploid and allowed only biallelic SNPs but polyploids may be characterized by high levels of heterozygosity and harbor multiallelic SNPs, which are excluded from further analysis. Both factors may bias the phylogenetic inference. On the other hand, a high proportion of heterozygous loci would result in grouping the polyploid species in the same main branch as their ancestors or closest relatives. The observed high posterior probabilities for the placement of these species in the phylogeny suggests that their grouping is correct.

#### 4.2.1 Phylogenetic analysis of the Hybridus complex

The Hybridus complex contains the domesticated grain amaranths and putative ancestors such as *A. hybridus*. Previous studies suggested that the Hybridus complex consists of two clades (Adhikary and Pratt, 2015). We also identified the two clades, but also a third one, which appears to be an intermediate of the two other ones. It consists of accessions from different species from Hybridus complex plus accessions that were labeled as 'hybrids' in the passport data, which suggests that it consists of genotypes that originated from hybridization. Interestingly, *A. hybridus* and *A. quitensis* accessions occur in all three clades (Figure 2), which may be explained by the geographic origin and geographic differentiation of these species. We previously suggested that *A. quitensis*, which is endemic to South America, and *A. hybridus* populations from the same region are a single species with a strong differentiation of geographically separated subpopulations (Stetter et al., 2015). Since such a taxonomic grouping is still under debate and *A. quitensis* might be a separate subspecies of *A. hybridus*, we treated them as separate species in the phylogenetic analysis as was done in previous studies (Kietlinski et al., 2014; Coons, 1978, 1982). A comparison of the position of individual *A. hybridus* and *A. quitensis* accessions in the neighbor joining tree with the species tree (obtained with SNAPP) showed that in the former, the two species are not strongly differentiated from each other (Figure 2) whereas they form independent lineages in the species tree, but are closely related and in a monophyletic group with the three grain amaranths (Figure 5). This may be explained by the fact that SNAPP uses pre-defined groups which forces the algorithm to separate the species and therefore does not allow to evaluate whether *A. quitensis* can be considered as a separate species.

## Amaranthus phylogeny

The taxonomic interpretation of species relationships in the Hybridus complex is further complicated by the geographic origin of the accessions used in this study and by the effects of domestication. Sauer (1967) suggested that both *A. hybridus* and *A. quitensis* may have been involved in the domestication of the grain amaranths. Our analysis is consistent with this notion because the three grain amaranths *A. caudatus*, *A. cruentus* and *A. hypochondriacus* and their wild relatives *A. hybridus* and *A. quitensis* are separated from the other amaranths. The species tree suggests that both wild species are more closely related to the South American *A. caudatus* than to the Central American *A. cruentus* and *A. hypochondriacus*, but the neighbor joining tree of individual accessions splits *A. hybridus* accessions by their geographic origin and clusters *A. hybridus* accessions collected in South America with the South American *A. caudatus* and *A. quitensis* and *A. hybridus* accessions collected in Central America with *A. cruentus* and *A. hypochondriacus*, which also are native to Central America.

Most evidence published so far suggests that *A. hybridus* is the direct ancestor of all three domesticated grain amaranth species (Chan and Sun, 1997; Park et al., 2014; Kietlinski et al., 2014; Stetter et al., 2015). *A. quitensis* is closely related to *A. caudatus* (Park et al., 2014; Xu and Sun, 2001; Stetter et al., 2015) and a low support of the split between *A. caudatus* and *A. quitensis* (Figures 4 and 5) reflects gene flow (Stetter et al., 2015) or indicates that *A. quitensis* is an intermediate between the wild *A. hybridus* and cultivated *A. caudatus* because it grows as weed in close proximity to grain amaranth fields and could have hybridized with *A. caudatus*. Another species for which a role in the domestication of grain amaranth was postulated is *A. powelli* (Sauer, 1967). In our analysis *A. powelli* is not closely related to the cultivated grain amaranths and therefore less likely a direct ancestor of *A. hypochondriacus* as proposed before (Sauer, 1967; Park et al., 2014; Xu and Sun, 2001).

Taken together, our analysis of the Hybridus complex is consistent with previous molecular phylogenies (Khaing et al., 2013; Chan and Sun, 1997) but we note that the GBS-based phylogenies show a weaker genetic differentiation between the different species of the complex. In addition, both *A. caudatus* and *A. hypochondriacus* are more closely related to *A. hybridus* than to each other, which was observed before (Kietlinski et al., 2014; Chan and Sun, 1997). The *A. hybridus* accessions show a strong split along the North-South gradient (i.e., Central vs. South America), which supports the hypothesis that two different *A. hybridus* lineages were the ancestors of the

three grain amaranths with a possible contribution of *A. quitensis* in the domestication of *A. caudatus* (Kietlinski et al., 2014; Adhikary and Pratt, 2015; Trucco and Tranel, 2011). Such a strong geographic pattern shows that in future studies of these species requires a comprehensive genetic sampling to understand the evolutionary history of these species.

### 4.3 Genome size evolution

The *Amaranthus* genes has undergone a whole genome duplication before speciation which was then followed by further duplication, chromosome loss and fusion events (Clouse et al., 2016; Behera and Patnaik, 1982). The mapping of genome size measurements onto the phylogeny revealed that the subgenus *Amaranthus* has a tendency towards smaller genomes, whereas species in the *Albersia* clade show increased genome sizes (Figure 5). These patterns are not strong and uniform within groups, however, because *A. dubius* has a larger genome size than expected for the clade. It may result from a genome duplication and a subsequent speciation of *A. dubius*, which is tetraploid (Behera and Patnaik, 1982). The genome size of *A. dubius* is not exactly twice the size of closely related species and indicates a loss of DNA after duplication. A similar pattern was observed in the genus *Chenopodium* which also belongs to the *Amaranthaceae* (Kolano et al., 2016).

Chromosome numbers in the Hybridus complex species are variable. *A. cruentus* has 17, and the other species 16 chromosomes (Greizerstein and Poggio, 1994), although it does not seem to strongly influence genome sizes (Greizerstein and Poggio, 1994; Stetter et al., 2015, Table 3). For some species we observed a strong deviation in genome sizes from previously reported values. The genome sizes of *A. caudatus*, *A. cruentus* and *A. hypochondriacus* are within the previously reported range of 465 to 611 Mbp, but the genome sizes of *A. retroflexus*, *A. spinosus* and *A. tricolor* were about 200 Mb smaller than previous values. We also found that the five species of the Hybridus complex have similar genome sizes whereas previous measures from these species strongly differ from each other (Bennett and Smith, 1991; Bennett et al., 1998; Ohri et al., 1981, <http://data.kew.org/cvalues>). A strong variation in genome size was also observed in the dioecious *A. Acnida* subgenus. Previous molecular studies already separated two members of this taxonomically defined subgenus *A. palmeri* and *A. tuberculatus* into different groups (Lanoue et al., 1996; Wassom and Tranel, 2005) and our study grouped the six species of this

## Amaranthus phylogeny

---

genus into two strongly differentiated clades of three species each, which differ by their average genome sizes. The genome size of *A. australis* is twice the size of *A. palmeri* and may result from a whole genome duplication (Mosyakin and Robertson, 1996). The closest relatives of *A. australis* are *A. floridanus* and *A. tuberculatus*, which also have larger genome sizes than most species. This indicates that the polyploidization happened during the ancestral split of this group. In contrast, *A. palmeri* and its two closest relatives have the smallest genome sizes of the genus. The test for neutral evolution using the Brownian motion simulation confirms that these clades significantly deviate from neutrality and indicate genome duplication and sequence losses (Figure 5).

Genome size may correlate with ecological and life history characteristics (e.g. Oyama et al., 2008). For example, one could postulate that herbicide tolerant weedy amaranths have a smaller genome size because they are faster cycling than their non-resistant relatives. We found that the genome sizes of the weedy amaranths are highly variable and there does not seem to be a strong relationship between resistance and genome size. For other traits like mating system the number of species in the genus with reliable information about such is too small to allow strong conclusions regarding the evolution of the genome sizes. In addition to polyploidization, genome size evolution is also driven by transposable element (TE) dynamics. Since GBS data sample only a small part of the genome and only one draft genome is currently available from the genus, it is not possible to evaluate the role of TEs in genome size evolution of the genus.

## 5 Conclusions

We showed that GBS is a suitable approach for the phylogenetic analysis of the *Amaranthus* genus. The large number of SNPs obtained from the *de novo* assembly of GBS sequencing reads and the high congruence of phylogenetic trees based on reference-mapping and *de novo* assembly indicates that a reference genome is not required and allows to study the molecular phylogeny of distantly related and non-model species. The inferred phylogeny based on 35 species largely confirms the previous taxonomic classification into three subgenera but also identified highly differentiated groups within the tree taxonomically defined subgenera. In particular, the subgenus *A. Acnida* consists of two groups that also show very different genome sizes. The

## Amaranthus phylogeny

---

comparison of a species tree obtained with the multispecies coalescent methods with a tree and network obtained from genetic distance matrix of multiple individual accessions from each species identified clades in which gene flow, hybridization or geographic differentiation influenced the genomic relationship of species. We also showed that the species in the Hybridus complex are closely related and were not separated along the species boundary, but are split into two main groups of accessions and species that reflect the geographically separated groups from South and Central America, respectively. The phylogeny of the genus further allowed to pinpoint the most likely ancestors and wild relatives of cultivated grain amaranths. In particular, *A. hybridus* appears to be the ancestor of all three crop amaranth species and the weed *A. quitensis* might be an intermediate between *A. hybridus* and *A. caudatus* or have contributed substantially to the domestication of *A. caudatus* by gene flow. Finally, the genome size measurements show a substantial range of values within the genus *Amaranthus*, but also indicates that polyploidization events are rare.

# References

- Adhikary, D. and D. B. Pratt. 2015. Morphologic and taxonomic analysis of the weedy and cultivated *Amaranthus hybridus* species complex. Systematic Botany 40:604–610.
- Andrews, K. R., J. M. Good, M. R. Miller, G. Luikart, and P. A. Hohenlohe. 2016. Harnessing the power of RADseq for ecological and evolutionary genomics. Nat Rev Genet 17:81–92.
- Ariani, A., J. C. Berny Mier y Teran, and P. Gepts. 2016. Genome-wide identification of SNPs and copy number variation in common bean (*Phaseolus vulgaris* L.) using genotyping-by-sequencing (GBS). Molecular Breeding 36:87.
- Behera, B. and S. N. Patnaik. 1982. Genome analysis of *Amaranthus dubius* Mart. ex Thell. through the study of *Amaranthus spinosus* × *A. dubius* hybrids. Cytologia 47:379–389.
- Bennett, M. D., I. J. Leitch, and L. Hanson. 1998. DNA amounts in two samples of angiosperm weeds. Annals of Botany 82:121–134.
- Bennett, M. D. and J. B. Smith. 1991. Nuclear DNA amounts in angiosperms. Philosophical Transactions of the Royal Society of London B: Biological Sciences 334:309–345.
- Bensch, C. N., M. J. Horak, and D. Peterson. 2003. Interference of redroot pigweed (*Amaranthus retroflexus*), Palmer amaranth (*A. palmeri*), and common waterhemp (*A. rudis*) in soybean. Weed Science 51:37–43.
- Bouckaert, R., J. Heled, D. Kühnert, T. Vaughan, C. H. Wu, D. Xie, M. A. Suchard, A. Rambaut, and A. J. Drummond. 2014. BEAST 2: A software platform for bayesian evolutionary analysis. PLoS Computational Biology 10:1–6.
- Brenner, D. M., W. G. Johnson, C. L. Sprague, P. J. Tranel, and B. G. Young. 2013. Crop–weed hybrids are more frequent for the grain amaranth ‘Plainsman’ than for ‘D136-1’. Genetic Resources and Crop Evolution 60:2201–2205.
- Browning, B. L. and S. R. Browning. 2016. Genotype imputation with millions of reference samples. The American Journal of Human Genetics 98:116–126.
- Bryant, D., R. Bouckaert, J. Felsenstein, N. A. Rosenberg, and A. RoyChoudhury. 2012. Inferring species trees directly from biallelic genetic markers: Bypassing gene trees in a full coalescent analysis. Molecular Biology and Evolution 29:1917–1932.
- Bryant, D. and V. Moulton. 2004. Neighbor-net: an agglomerative method for the construction of phylogenetic networks. Molecular Biology and Evolution 21:255–65.
- Catchen, J., P. A. Hohenlohe, S. Bassham, A. Amores, and W. A. Cresko. 2013. Stacks: an analysis tool set for population genomics. Molecular Ecology 22:3124–40.
- Catchen, J. M., A. Amores, P. Hohenlohe, W. Cresko, and J. H. Postlethwait. 2011. Stacks: building and genotyping Loci de novo from short-read sequences. G3 (Bethesda, Md.) 1:171–82.
- Chan, K. F. and M. Sun. 1997. Genetic diversity and relationships detected by isozyme and RAPD analysis of crop and wild species of *Amaranthus*. Theoretical and Applied Genetics 95:865–873.

# Amaranthus phylogeny

- Clouse, J. W., D. Adhikary, J. T. Page, T. Ramaraj, M. K. Deyholos, J. A. Udall, D. J. Fairbanks, E. N. Jellen, and P. J. Maughan. 2016. The amaranth genome: Genome, transcriptome, and physical map assembly. *The Plant Genome* 9.
- Coons, M. 1982. Relationships of *Amaranthus caudatus*. *Economic Botany* 36:129–146.
- Coons, M. P. 1978. The status of *Amaranthus hybridus* L. in South America. *Cienc. Nat.* 18.
- Costea, M. and D. DeMason. 2001. Stem morphology and anatomy in *Amaranthus* L. (*Amaranthaceae*), taxonomic significance. *Journal of the Torrey Botanical Society* 128:254–281.
- DaCosta, J. M. and M. D. Sorenson. 2016. ddRAD-seq phylogenetics based on nucleotide, indel, and presence–absence polymorphisms: Analyses of two avian genera with contrasting histories. *Molecular Phylogenetics and Evolution* 94:122–135.
- Danecek, P., A. Auton, G. Abecasis, C. A. Albers, E. Banks, M. A. DePristo, R. E. Handsaker, G. Lunter, G. T. Marth, S. T. Sherry, G. McVean, and R. Durbin. 2011. The variant call format and VCFtools. *Bioinformatics (Oxford, England)* 27:2156–8.
- Das, S. 2014. Domestication, phylogeny and taxonomic delimitation in underutilized grain *Amaranthus* (Amaranthaceae) - a status review. *Feddes Repertorium* Pages 1–10.
- Davis, A. S., B. J. Schutte, A. G. Hager, and B. G. Young. 2015. Palmer amaranth (*Amaranthus palmeri*) damage niche in Illinois soybean is seed limited. *Weed Science* 63:658–668.
- Dohm, J. C., A. E. Minoche, D. Holtgräwe, S. Capella-Gutiérrez, F. Zakrzewski, H. Tafer, O. Rupp, T. R. Sörensen, R. Stracke, R. Reinhardt, A. Goesmann, T. Kraft, B. Schulz, P. F. Stadler, T. Schmidt, T. Gabaldón, H. Lehrach, B. Weisshaar, and H. Himmelbauer. 2014. The genome of the recently domesticated crop plant sugar beet (*Beta vulgaris*). *Nature* 505:546–9.
- Dolezel, J., J. Bartos, H. Voglmayr, and J. Greilhuber. 2003. Nuclear DNA content and genome size of trout and human. *Cytometry. Part A : the journal of the International Society for Analytical Cytology* 51:127–8; author reply 129.
- Dolezel, J., S. Sgorbati, and S. Lucretti. 1992. Comparison of three DNA fluorochromes for flow cytometric estimation of nuclear DNA content in plants. *Physiol. Plant* 85:625–631.
- Eaton, D. A. R. and R. H. Ree. 2013. Inferring phylogeny and introgression using RADseq data: An example from flowering plants (*Pedicularis: Orobanchaceae*). *Systematic Biology* 62:689–706.
- Elshire, R. J., J. C. Glaubitz, Q. Sun, J. A. Poland, K. Kawamoto, E. S. Buckler, and S. E. Mitchell. 2011. A robust, simple genotyping-by-sequencing (GBS) approach for high diversity species. *PloS one* 6:e19379.
- Greizerstein, E. J. and L. Poggio. 1994. Karyological studies in grain amaranths. *Cytologia* 59:25–30.
- Harvey, M. G., B. T. Smith, T. C. Glenn, B. C. Faircloth, and R. T. Brumfield. 2016. Sequence capture versus restriction site associated DNA sequencing for shallow systematics. *Systematic Biology* .
- Huson, D. H. and D. Bryant. 2006. Application of phylogenetic networks in evolutionary studies. *Molecular Biology and Evolution* 23:254–67.



# Amaranthus phylogeny

- Jimenez, F. R., P. J. Maughan, A. Alvarez, K. D. Kietlinski, S. M. Smith, D. B. Pratt, D. B. Elzinga, and E. N. Jellen. 2013. Assessment of genetic diversity in Peruvian amaranth (*Amaranthus caudatus* and *A. hybridus*) germplasm using single nucleotide polymorphism markers. *Crop Science* 53:532.
- Khaing, A. A., K. T. Moe, J.-W. Chung, H.-J. Baek, and Y.-J. Park. 2013. Genetic diversity and population structure of the selected core set in *Amaranthus* using SSR markers. *Plant Breeding* 132:165–173.
- Kietlinski, K. D., F. Jimenez, E. N. Jellen, P. J. Maughan, S. M. Smith, and D. B. Pratt. 2014. Relationships between the weedy *Amaranthus hybridus* (*Amaranthaceae*) and the grain amaranths. *Crop Science* 54:220.
- Kolano, B., J. McCann, M. Orzechowska, D. Siwinska, E. Temsch, and H. Weiss-Schneeweiss. 2016. Molecular and cytogenetic evidence for an allotetraploid origin of *Chenopodium quinoa* and *C. berlandieri* (*Amaranthaceae*). *Molecular Phylogenetics and Evolution* 100:109–123.
- Lanoue, K. Z., P. G. Wolf, S. Browning, and E. E. Hood. 1996. Phylogenetic analysis of restriction-site variation in wild and cultivated *Amaranthus* species (*Amaranthaceae*). *Theoretical and Applied Genetics* 93:722–32.
- Li, H. and R. Durbin. 2009. Fast and accurate short read alignment with Burrows-Wheeler transform. *Bioinformatics* 25:1754–1760.
- Li, H., B. Handsaker, A. Wysoker, T. Fennell, J. Ruan, N. Homer, G. Marth, G. Abecasis, and R. Durbin. 2009. The sequence alignment/map format and SAMtools. *Bioinformatics* 25:2078–2079.
- Mastretta-Yanes, a., N. Arrigo, N. Alvarez, T. H. Jorgensen, D. Piñero, and B. C. Emerson. 2015. Restriction site-associated DNA sequencing, genotyping error estimation and *de novo* assembly optimization for population genetic inference. *Molecular Ecology Resources* 15:28–41.
- Mosyakin, S. L. and K. R. Robertson. 1996. New infrageneric taxa and combinations in *Amaranthus* (*Amaranthaceae*). *Annales Botanici Fennici* 33:275–281.
- Nicotra, A. B., C. Chong, J. G. Bragg, C. R. Ong, N. C. Aitken, A. Chuah, B. Lepschi, and J. O. Borevitz. 2016. Population and phylogenomic decomposition via genotyping-by-sequencing in Australian *Pelargonium*. *Molecular Ecology* 25:2000–2014.
- Ohri, D., M. A. Nazeer, and M. N. B. R. I. Pal Lucknow (India)). 1981. Cytophotometric estimation of nuclear DNA in some ornamentals.
- Oyama, R. K., M. J. Clauss, N. Formanová, J. Kroymann, K. J. Schmid, H. Vogel, K. Weniger, A. J. Windsor, and T. Mitchell-Olds. 2008. The shrunken genome of *arabidopsis thaliana*. *Plant Systematics and Evolution* 273:257–271.
- Paradis, E., J. Claude, and K. Strimmer. 2004. APE: Analyses of phylogenetics and evolution in R language. *Bioinformatics* 20:289–290.
- Park, Y. J., T. Nishikawa, K. Matsushima, M. Minami, N. Tomooka, and K. Nemoto. 2014. Molecular characterization and genetic diversity of the starch branching enzyme (SBE) gene from *Amaranthus*: the evolutionary origin of grain amaranths. *Molecular Breeding* 34:1975–1985.



# Amaranthus phylogeny

- 597 Paul, S., S. Fe, and S. Paul. 2013. Phylogenetic signal variation in the genomes of *Medicago*  
598 (*Fabaceae*). *Systematic Biology* 0:1–15.
- 599 Poland, J. A., P. J. Brown, M. E. Sorrells, and J.-L. Jannink. 2012. Development of high-  
600 density genetic maps for barley and wheat using a novel two-enzyme genotyping-by-sequencing  
601 approach. *PloS one* 7:e32253.
- 602 R Core Team. 2014. R: A language and environment for statistical computing. R Foundation  
603 for Statistical Computing Vienna, Austria.
- 604 Rastogi, A. and S. Shukla. 2013. Amaranth: a new millennium crop of nutraceutical values.  
605 *Critical reviews in food science and nutrition* 53:109–25.
- 606 Revell, L. J. 2012. phytools: an r package for phylogenetic comparative biology (and other  
607 things). *Methods in Ecology and Evolution* 3:217–223.
- 608 Saghai-Marooof, M. A., K. M. Soliman, R. A. Jorgensen, and R. W. Allard. 1984. Ribosomal  
609 DNA spacer-length polymorphisms in barley: mendelian inheritance, chromosomal location,  
610 and population dynamics. *Proceedings of the National Academy of Sciences of the United*  
611 *States of America* 81:8014–8018.
- 612 Sauer, J. 1967. The grain amaranths and their relatives: a revised taxonomic and geographic  
613 survey. *Annals of the Missouri Botanical Garden* 54:103–137.
- 614 Steckel, L. E. and C. L. Sprague. 2004. Common waterhemp (*Amaranthus rudis*) interference in  
615 corn. *Weed Science* 52:359–364.
- 616 Stetter, M. G., T. Müller, and K. Schmid. 2015. Incomplete domestication of South American  
617 grain amaranth (*Amaranthus caudatus*) from its wild relatives. *bioRxiv* .
- 618 Trucco, F., M. R. Jeschke, A. L. Rayburn, and P. J. Tranel. 2005. *Amaranthus hybridus* can be  
619 pollinated frequently by *A. tuberculatus* under field conditions. *Heredity* 94:64–70.
- 620 Trucco, F. and P. J. Tranel. 2011. Wild crop relatives: Genomic and breeding resources. Springer  
621 Berlin Heidelberg, Berlin, Heidelberg.
- 622 Wassom, J. J. and P. J. Tranel. 2005. Amplified fragment length polymorphism-based genetic  
623 relationships among weedy *Amaranthus* species. *Journal of Heredity* 96:410–416.
- 624 Xu, F. and M. Sun. 2001. Comparative analysis of phylogenetic relationships of grain amaranths  
625 and their wild relatives (*Amaranthus*; *Amaranthaceae*) using internal transcribed spacer, am-  
626 plified fragment length polymorphism, and double-primer fluorescent intersimple sequence.  
627 *Molecular Phylogenetics and Evolution* 21:372–387.

## 6 Figures

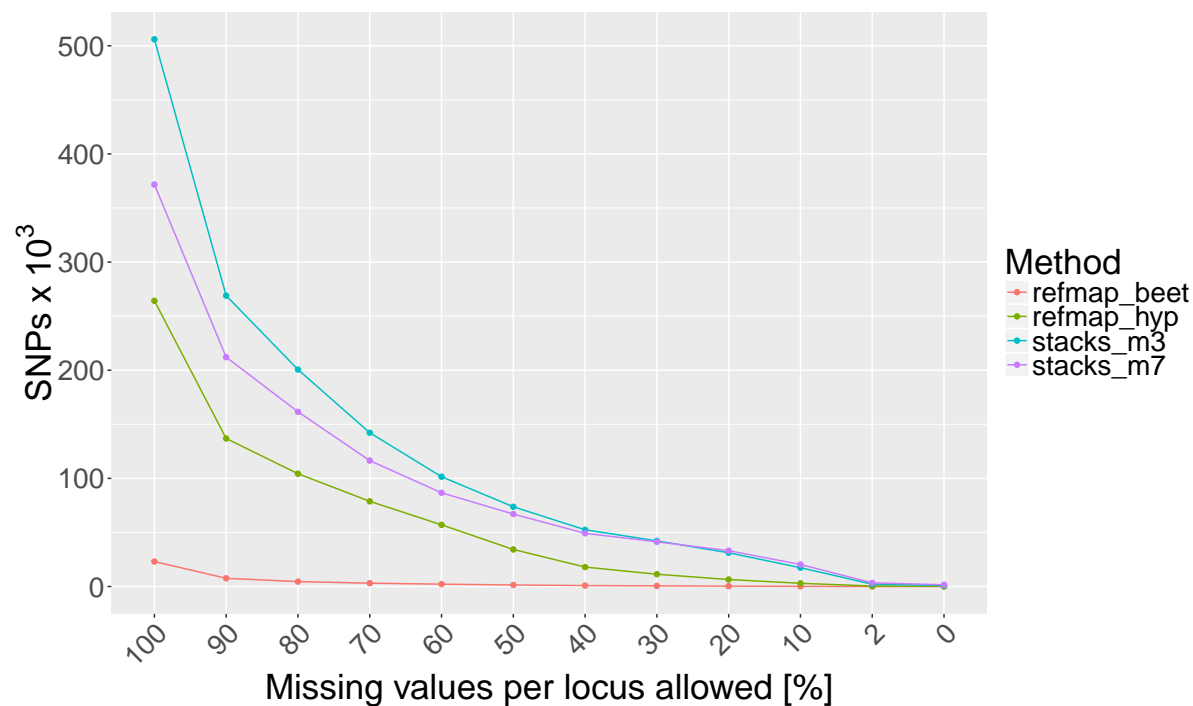

Figure 1: Number of SNPs recovered at different levels of missing values allowed per locus. Data sets are labeled as follows: refmap\_beet, reference mapping against sugar beet; refmap\_hyp, reference mapping against *Amaranthus hypochondriacus*; stacks\_m3, *de novo* assembly with Stacks using parameter value  $m = 3$  for minimal read coverage and stacks\_m7, parameter value  $m = 7$ .

# Amaranthus phylogeny

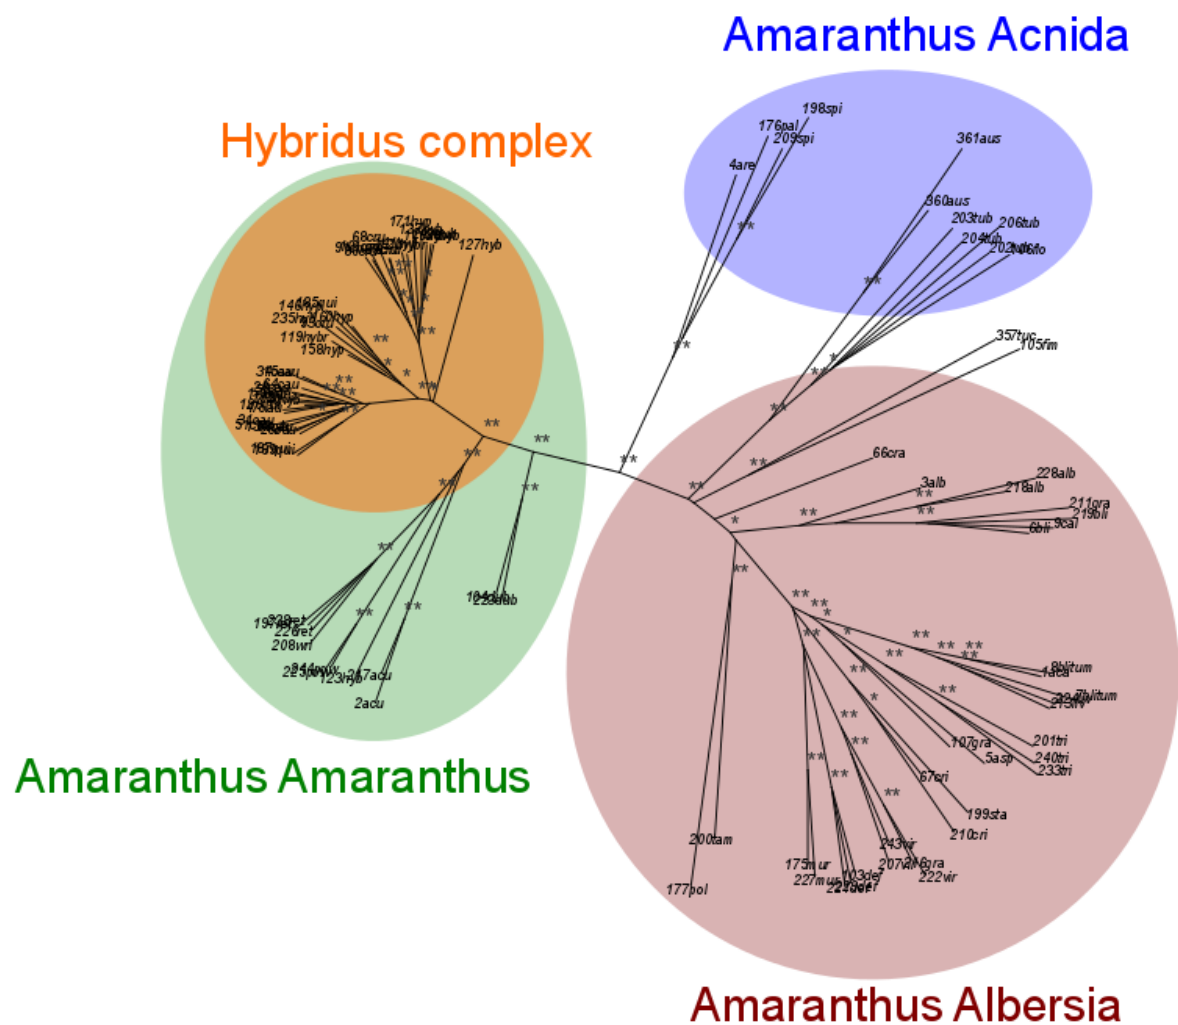

Figure 2: Neighbor joining tree calculated from the Euclidean distances of 94 individuals representing 35 *Amaranthus* species. Single stars (\*) indicate bootstrap values over 90% and double stars (\*\*) indicate bootstrap values of 100%.

# Amaranthus phylogeny

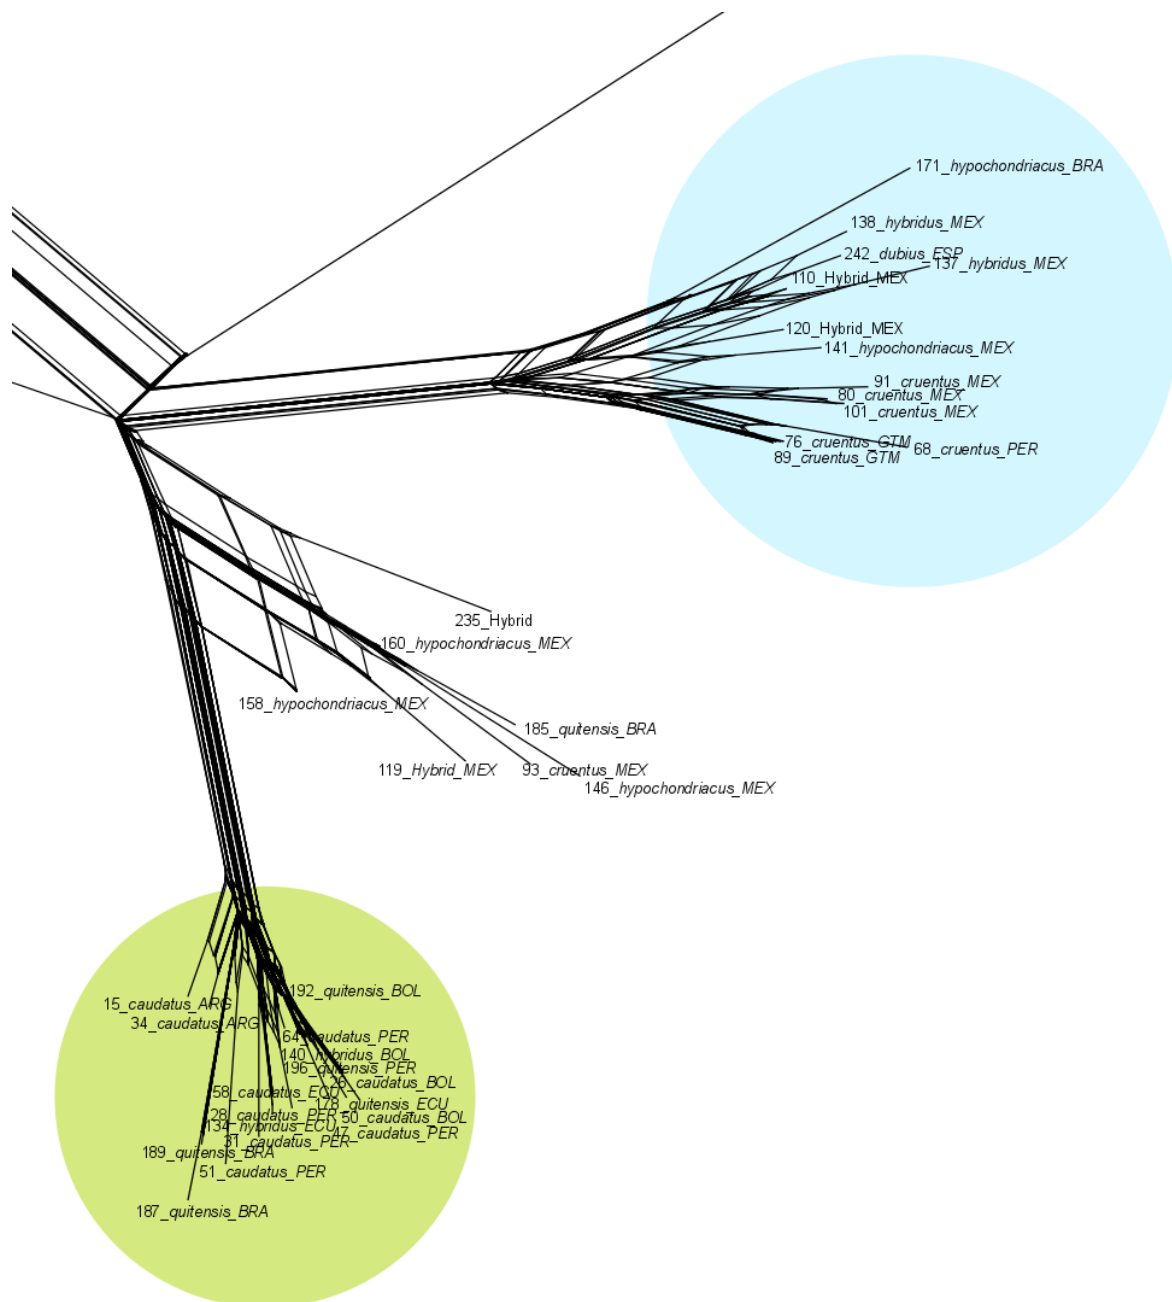

Figure 3: Section of the NeighborNet network showing the Hybridus complex. The blue circle includes the Central American grain amaranths (*A. hypochondriacus*, *A. cruentus*) and the potential wild ancestor *A. hybridus*. The green circle includes South American grain amaranth (*A. caudatus* and the potential ancestors (*A. hybridus* and *A. quitensis*). Thole network is shown in supplementary figure S1.

# Amaranthus phylogeny

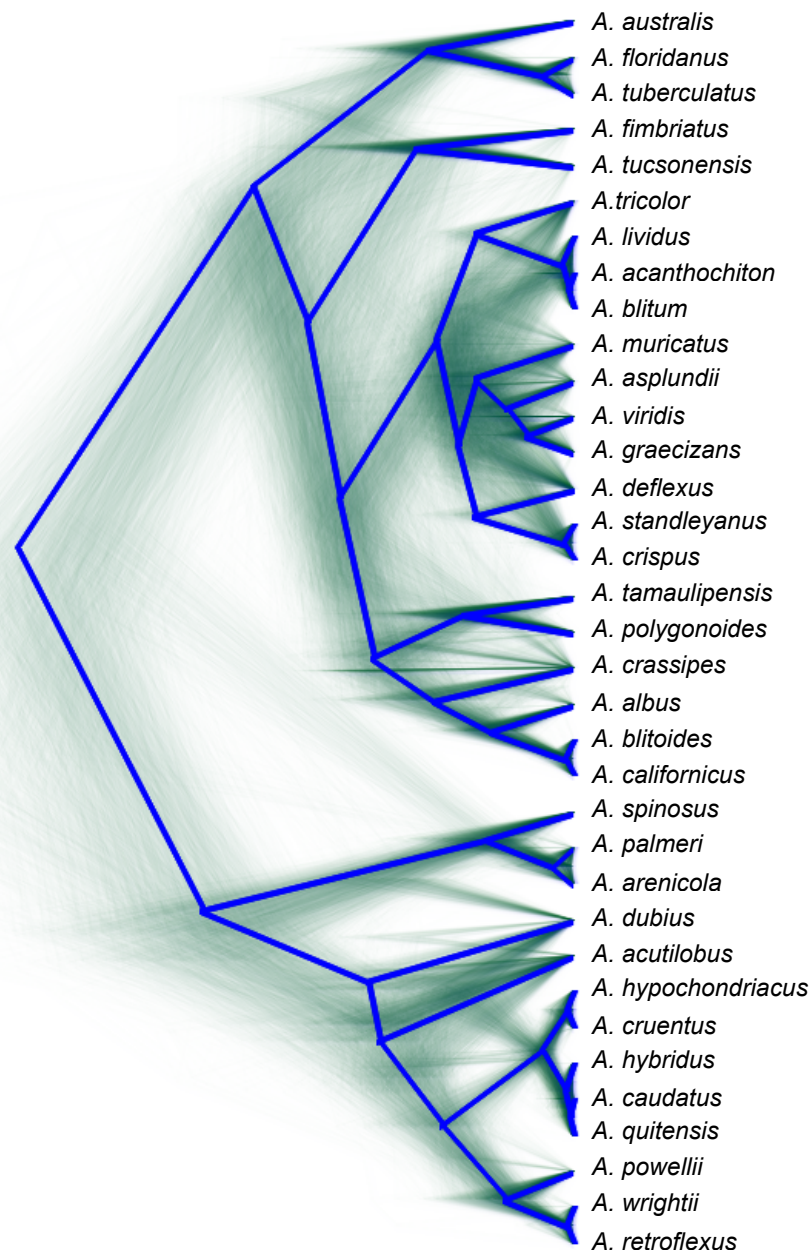

Figure 4: Species tree of *Amaranthus* based on the multispecies coalescent calculated with SNAPP. The cloudogram (green lines) represents 3980 individual trees and the consensus tree is shown in blue color.

# Amaranthus phylogeny

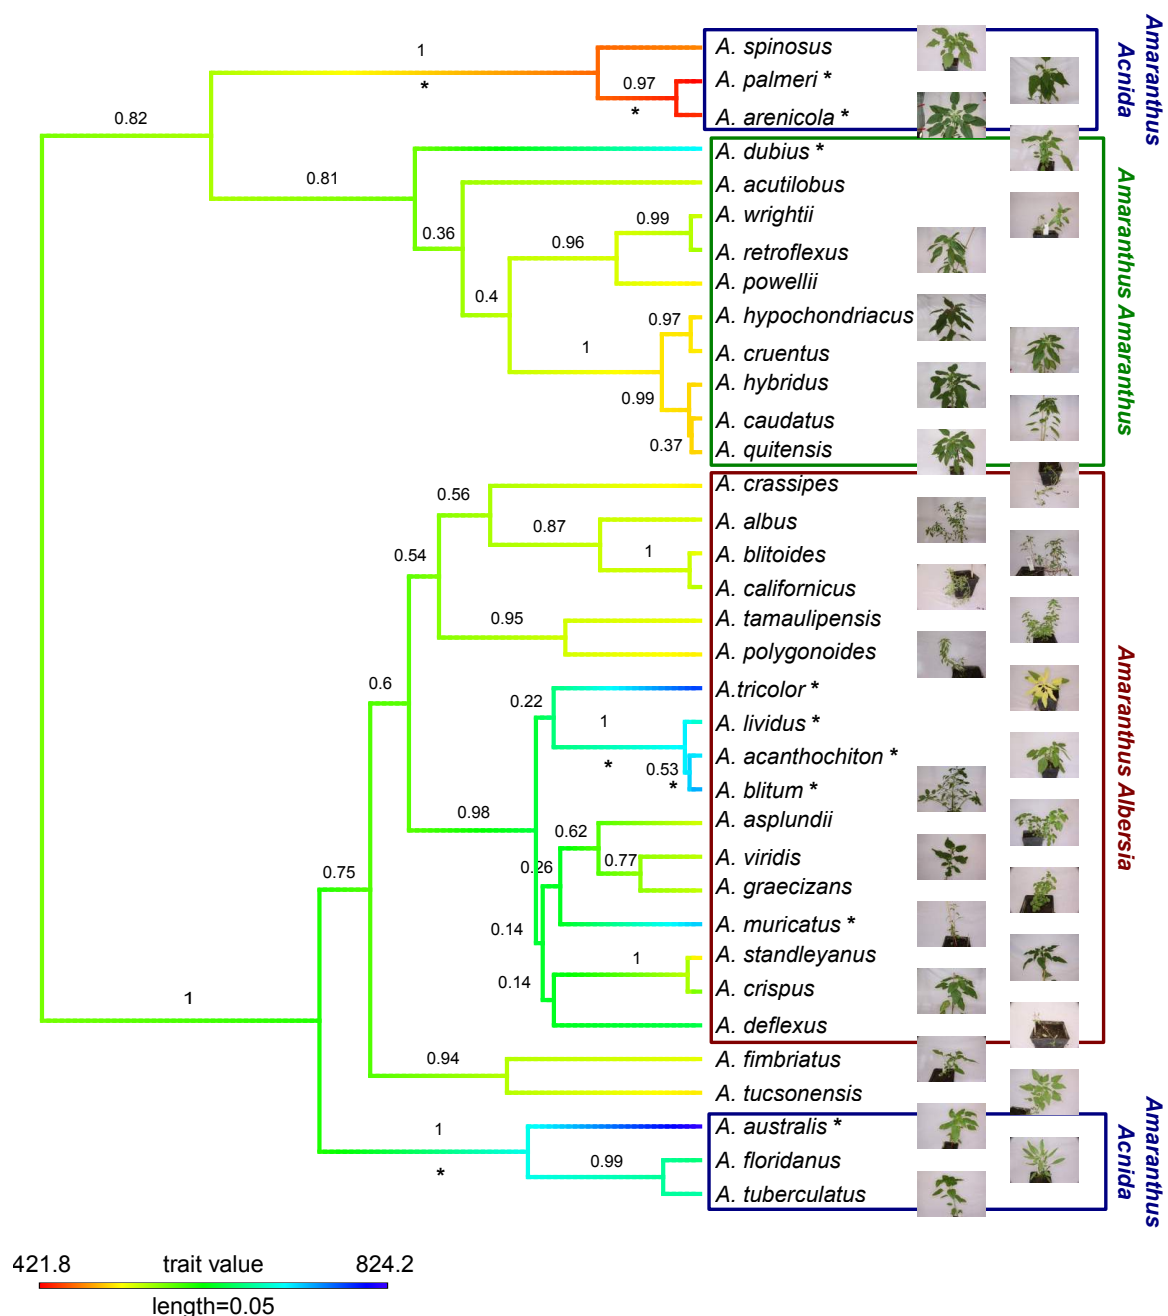

Figure 5: Genome size evolution mapped onto consensus tree obtained with SNAPP. The branch labels show posterior probabilities of genome size estimates of interior nodes obtained with a Maximum Likelihood method implemented in the **fastAnc** function of the phytools R package. Branch colors show estimated genome sizes in Mbp. Stars (\*) indicate deviation from neutral evolution of genome size at 95% confidence level. Group labels annotate taxonomic subgenera.

## 629 7 Tables

Table 1: List of samples included in this study

| D   | species                   | accession number | Genebank | Country   |
|-----|---------------------------|------------------|----------|-----------|
| 1   | <i>A. acanthochiton</i>   | PI 632238 *      | USDA/ARS | USA       |
| 2   | <i>A. acutilobus</i>      | PI 633579        | USDA/ARS |           |
| 3   | <i>A. albus</i>           | PI 608029        | USDA/ARS | USA       |
| 4   | <i>A. arenicola</i>       | PI 667167        | USDA/ARS | Mexico    |
| 5   | <i>A. asplundii</i>       | PI 604196 *      | USDA/ARS | Ecuador   |
| 6   | <i>A. blitoides</i>       | PI 649301        | USDA/ARS | USA       |
| 7   | <i>A. blitum</i>          | PI 490298        | USDA/ARS | Kenya     |
| 8   | <i>A. blitum</i>          | PI 612860        | USDA/ARS | USA       |
| 9   | <i>A. californicus</i>    | PI 595319        | USDA/ARS | USA       |
| 15  | <i>A. caudatus</i>        | PI 511680 *      | USDA/ARS | Argentina |
| 26  | <i>A. caudatus</i>        | PI 642741        | USDA/ARS | Bolivia   |
| 28  | <i>A. caudatus</i>        | PI 649230 †      | USDA/ARS | Peru      |
| 31  | <i>A. caudatus</i>        | PI 649235 †      | USDA/ARS | Peru      |
| 34  | <i>A. caudatus</i>        | PI 511679 * †    | USDA/ARS | Argentina |
| 47  | <i>A. caudatus</i>        | PI 649217 †      | USDA/ARS | Peru      |
| 50  | <i>A. caudatus</i>        | PI 511681 * †    | USDA/ARS | Bolivia   |
| 51  | <i>A. caudatus</i>        | PI 649228 *      | USDA/ARS | Peru      |
| 58  | <i>A. caudatus</i>        | PI 608019        | USDA/ARS | Ecuador   |
| 64  | <i>A. caudatus</i>        | Ames 5302 †      | USDA/ARS | Peru      |
| 66  | <i>A. crassipes</i>       | PI 649302        | USDA/ARS | USA       |
| 67  | <i>A. crispus</i>         | PI 633582        | USDA/ARS |           |
| 68  | <i>A. cruentus</i>        | PI 511714 *      | USDA/ARS | Peru      |
| 76  | <i>A. cruentus</i>        | PI 667160        | USDA/ARS | Guatemala |
| 80  | <i>A. cruentus</i>        | PI 576481        | USDA/ARS | Mexico    |
| 89  | <i>A. cruentus</i>        | PI 433228 * †    | USDA/ARS | Guatemala |
| 91  | <i>A. cruentus</i>        | PI 658728 †      | USDA/ARS | Mexico    |
| 93  | <i>A. cruentus</i>        | PI 511876        | USDA/ARS | Mexico    |
| 101 | <i>A. cruentus</i>        | PI 643037 †      | USDA/ARS | Mexico    |
| 103 | <i>A. deflexus</i>        | PI 667169        | USDA/ARS | Argentina |
| 104 | <i>A. dubius</i>          | Ames 25792 *     | USDA/ARS | Panama    |
| 105 | <i>A. fimbriatus</i>      | PI 605738        | USDA/ARS | Mexico    |
| 106 | <i>A. floridanus</i>      | PI 553078        | USDA/ARS | USA       |
| 107 | <i>A. graecizans</i>      | PI 173837        | USDA/ARS | India     |
| 110 | <i>A. hybr.</i>           | PI 604571 †      | USDA/ARS | Mexico    |
| 119 | <i>A. hybr.</i>           | PI 604564 †      | USDA/ARS | Mexico    |
| 120 | <i>A. hybr.</i>           | PI 604566 †      | USDA/ARS | Mexico    |
| 123 | <i>A. hybridus</i>        | Ames 5232 †      | USDA/ARS | Peru      |
| 127 | <i>A. hybridus</i>        | PI 636180        | USDA/ARS | Colombia  |
| 134 | <i>A. hybridus</i>        | PI 667156        | USDA/ARS | Ecuador   |
| 137 | <i>A. hybridus</i>        | PI 604568 †      | USDA/ARS | Mexico    |
| 138 | <i>A. hybridus</i>        | PI 604574        | USDA/ARS | Mexico    |
| 140 | <i>A. hybridus</i>        | Ames 5335 *      | USDA/ARS | Bolivia   |
| 141 | <i>A. hypochondriacus</i> | PI 649587        | USDA/ARS | Mexico    |
| 146 | <i>A. hypochondriacus</i> | PI 633589        | USDA/ARS | Mexico    |



# Amaranthus phylogeny

| ID  | Species                   | Accession number | Genebank | Country   |
|-----|---------------------------|------------------|----------|-----------|
| 158 | <i>A. hypochondriacus</i> | PI 604595 †      | USDA/ARS | Mexico    |
| 160 | <i>A. hypochondriacus</i> | PI 649529        | USDA/ARS | Mexico    |
| 171 | <i>A. hypochondriacus</i> | PI 652432        | USDA/ARS | Brazil    |
| 175 | <i>A. muricatus</i>       | PI 633583        | USDA/ARS | Spain     |
| 176 | <i>A. palmeri</i>         | PI 633593        | USDA/ARS | Mexico    |
| 177 | <i>A. polygonoides</i>    | PI 658733        | USDA/ARS | USA       |
| 178 | <i>A. quitensis</i>       | PI 511747        | USDA/ARS | Ecuador   |
| 185 | <i>A. quitensis</i>       | PI 652426        | USDA/ARS | Brazil    |
| 187 | <i>A. quitensis</i>       | PI 652428 †      | USDA/ARS | Brazil    |
| 189 | <i>A. quitensis</i>       | PI 652422        | USDA/ARS | Brazil    |
| 192 | <i>A. quitensis</i>       | PI 511736 * †    | USDA/ARS | Bolivia   |
| 196 | <i>A. quitensis</i>       | Ames 5342        | USDA/ARS | Peru      |
| 197 | <i>A. retroflexus</i>     | PI 603852        | USDA/ARS | USA       |
| 198 | <i>A. spinosus</i>        | PI 500237        | USDA/ARS | Zambia    |
| 199 | <i>A. standleyanus</i>    | PI 605739        | USDA/ARS | Argentina |
| 200 | <i>A. tamaulipensis</i>   | PI 642738        | USDA/ARS | Cuba      |
| 201 | <i>A. tricolor</i>        | PI 603896        | USDA/ARS |           |
| 202 | <i>A. tuberculatus</i>    | PI 604247        | USDA/ARS | USA       |
| 203 | <i>A. tuberculatus</i>    | PI 603865        | USDA/ARS | USA       |
| 204 | <i>A. tuberculatus</i>    | PI 603872        | USDA/ARS | USA       |
| 206 | <i>A. tuberculatus</i>    | Ames 24593       | USDA/ARS | USA       |
| 207 | <i>A. viridis</i>         | PI 654388        | USDA/ARS | USA       |
| 208 | <i>A. wrightii</i>        | PI 632243        | USDA/ARS | USA       |
| 209 | <i>A. spinosus</i>        | AMA 13           | IPK      |           |
| 210 | <i>A. crispus</i>         | AMA 14           | IPK      |           |
| 211 | <i>A. graecizans</i>      | AMA 24           | IPK      |           |
| 213 | <i>A. lividus</i>         | AMA 49           | IPK      |           |
| 216 | <i>A. graecizans</i>      | AMA 62           | IPK      |           |
| 217 | <i>A. acutilobus</i>      | AMA 63           | IPK      |           |
| 218 | <i>A. albus</i>           | AMA 65           | IPK      | Canada    |
| 219 | <i>A. blitoides</i>       | AMA 66           | IPK      |           |
| 221 | <i>A. deflexus</i>        | AMA 76           | IPK      |           |
| 222 | <i>A. viridis</i>         | AMA 79           | IPK      | Peru      |
| 223 | <i>A. dubius</i>          | AMA 80           | IPK      | Rwanda    |
| 224 | <i>A. lividus</i>         | AMA 87           | IPK      | Rwanda    |
| 225 | <i>A. powellii</i>        | AMA 89           | IPK      | Rwanda    |
| 226 | <i>A. retroflexus</i>     | AMA 93           | IPK      | Mexico    |
| 227 | <i>A. muricatus</i>       | AMA 95           | IPK      |           |
| 228 | <i>A. albus</i>           | AMA 96           | IPK      |           |
| 229 | <i>A. deflexus</i>        | AMA 97           | IPK      |           |
| 233 | <i>A. tricolor</i>        | AMA 149          | IPK      |           |
| 235 | <i>A. hybr.</i>           | AMA 147 †        | IPK      |           |
| 238 | <i>A. retroflexus</i>     | AMA 105          | IPK      | China     |
| 240 | <i>A. tricolor</i>        | AMA 126          | IPK      | Cuba      |
| 242 | <i>A. dubius</i>          | AMA 140          | IPK      | Spain     |
| 243 | <i>A. viridis</i>         | AMA 175          | IPK      |           |
| 244 | <i>A. powellii</i>        | AMA 170          | IPK      | Germany   |



## Amaranthus phylogeny

---

| ID  | Species               | Accession number | Genebank | Country |
|-----|-----------------------|------------------|----------|---------|
| 357 | <i>A. tucsonensis</i> | PI 664490        | IPK      | USA     |
| 360 | <i>A. australis</i>   | PI 553076        | IPK      | USA     |
| 361 | <i>A. australis</i>   | PI 553077        | IPK      | USA     |

\* Accessions not included in genome size measurements

† Accessions not included in SNAPP analysis

## Amaranthus phylogeny

Table 2: Summary of four GBS datasets obtained by different SNP calling methods and parameters.

| Name        | Reference map           | Tool          | Mapped reads         | SNPs  | Missing (%) |
|-------------|-------------------------|---------------|----------------------|-------|-------------|
| refmap_hyp  | Ahypochochondriacus_1_0 | BWA, Samtools | 166,935,845 (74.8%)  | 2,978 | 5.2         |
| refmap_beet | RefBeet-1_2             | BWA, Samtools | 57,766,877 (25.9%)   | 1,439 | 31.7        |
| stacks_m3   | <i>de novo</i> catalog  | Stacks        | 223,104,991 (100.0%) | 2,181 | 0.6         |
| stacks_m7   | <i>de novo</i> catalog  | Stacks        | 223,104,991 (100.0%) | 3,416 | 0.6         |

# Amaranthus phylogeny

Table 3: Estimated genome size of *Amaranthus* species. *n* is the number of genotypes sampled per species.

| species                                        | <i>n</i> | Size (Mbp) | Standard Error | Lower CI | Upper CI |
|------------------------------------------------|----------|------------|----------------|----------|----------|
| <i>A. acutilobus</i>                           | 3        | 532.5      | 34.3           | 463.8    | 601.2    |
| <i>A. albus</i>                                | 3        | 530.3      | 33.4           | 463.2    | 597.3    |
| <i>A. arenicola</i>                            | 1        | 438.6      | 57.1           | 323.9    | 553.3    |
| <i>A. asplundii</i>                            | 1        | 535.0      | 57.1           | 420.2    | 649.7    |
| <i>A. australis</i>                            | 2        | 824.2      | 44.4           | 735.7    | 912.8    |
| <i>A. blitoides</i>                            | 3        | 521.9      | 33.4           | 454.8    | 588.9    |
| <i>A. blitum</i>                               | 2        | 748.8      | 40.6           | 667.2    | 830.4    |
| <i>A. californicus</i>                         | 1        | 547.9      | 57.1           | 433.2    | 662.6    |
| <i>A. caudatus</i>                             | 6        | 502.0      | 24.0           | 453.6    | 550.4    |
| <i>A. crassipes</i>                            | 1        | 512.5      | 62.4           | 388.1    | 637.0    |
| <i>A. crispus</i>                              | 2        | 576.0      | 40.6           | 494.4    | 657.6    |
| <i>A. cruentus</i>                             | 5        | 510.9      | 26.1           | 458.3    | 563.6    |
| <i>A. deflexus</i>                             | 3        | 640.2      | 33.4           | 573.1    | 707.2    |
| <i>A. dubius</i>                               | 2        | 711.9      | 40.6           | 630.3    | 793.5    |
| <i>A. fimbriatus</i>                           | 1        | 527.2      | 57.1           | 412.5    | 641.9    |
| <i>A. floridanus</i>                           | 1        | 658.2      | 57.1           | 543.5    | 772.9    |
| <i>A. graecizans</i>                           | 3        | 541.0      | 33.4           | 473.9    | 608.0    |
| <i>A. hybr.</i>                                | 3        | 508.0      | 33.4           | 440.9    | 575.0    |
| <i>A. hybridus</i>                             | 5        | 503.8      | 26.1           | 451.1    | 556.4    |
| <i>A. hybridus</i> x <i>A. hypochondriacus</i> | 1        | 523.8      | 57.1           | 409.1    | 638.5    |
| <i>A. hypochondriacus</i>                      | 5        | 506.4      | 26.1           | 453.7    | 559.0    |
| <i>A. lividus</i>                              | 2        | 685.8      | 40.6           | 604.2    | 767.4    |
| <i>A. muricatus</i>                            | 2        | 729.6      | 40.6           | 648.0    | 811.2    |
| <i>A. palmeri</i>                              | 1        | 421.8      | 57.1           | 307.1    | 536.5    |
| <i>A. polygonoides</i>                         | 1        | 512.3      | 57.1           | 397.6    | 627.0    |
| <i>A. powellii</i>                             | 2        | 512.3      | 40.6           | 430.7    | 593.9    |
| <i>A. quitensis</i>                            | 4        | 501.1      | 29.6           | 441.5    | 560.6    |
| <i>A. retroflexus</i>                          | 3        | 555.6      | 33.4           | 488.6    | 622.7    |
| <i>A. spinosus</i>                             | 2        | 471.6      | 40.6           | 390.0    | 553.2    |
| <i>A. standleyanus</i>                         | 1        | 502.9      | 57.1           | 388.2    | 617.6    |
| <i>A. tamaulipensis</i>                        | 1        | 524.9      | 57.1           | 410.2    | 639.6    |
| <i>A. tricolor</i>                             | 3        | 782.7      | 33.4           | 715.7    | 849.8    |
| <i>A. tuberculatus</i>                         | 4        | 675.6      | 27.0           | 621.4    | 729.8    |
| <i>A. tucsonensis</i>                          | 1        | 510.4      | 57.1           | 395.7    | 625.1    |
| <i>A. viridis</i>                              | 3        | 543.1      | 33.4           | 476.1    | 610.2    |
| <i>A. wrightii</i>                             | 1        | 534.3      | 57.1           | 419.6    | 649.0    |
